# Supplementary material for: TopBP1 Interacts with BLM to Maintain Genome Stability but Is Dispensable for Preventing BLM Degradation
Source: PubMed Central journal article supplement (PMC4374139; doi:10.1016/j.molcel.2015.02.012), 2015-03-19
Supplement: mmc1.pdf [file mmc1.pdf]

Molecular Cell, Volume 57

## **Supplemental Information**

### **TopBP1 Interacts with BLM to Maintain Genome Stability but Is Dispensable for Preventing BLM Degradation**

Andrew N. Blackford, Jadwiga Nieminuszczy, Rebekka A. Schwab,  
Yaron Galanty, Stephen P. Jackson, and Wojciech Niedzwiedz

| PROTEIN | PEPTIDES |
|---------|----------|
| TOPBP1  | 124      |
| BLM     | 51       |
| MDC1    | 49       |
| RFC1    | 45       |
| 53BP1   | 25       |
| RFC3    | 22       |
| IWS1    | 22       |
| TCOF1   | 21       |
| RFC4    | 20       |

**Figure S1 (related to Figure 1): Identification of TopBP1-associated proteins by mass spectrometry.** Pulldowns were carried out from 293FT cells transiently transfected with plasmids expressing GFP-tagged TopBP1 or GFP as a control. The top hits found exclusively in the GFP-TopBP1 sample are shown in the table.

```

Human      133 DTALKKLEFSSSPDSLSTI-NDWDDMDDFDTSETSKSFVTPPQSHFVRVSTAQKSKKGRNFFKAQLYTT
Mouse      133 VAVFKKLEFSSSA---DSL-SDWADMDDFDMSASDAF-ASLAKNPATRVSTAQKMKTKRNFPPRKA
Chicken    97  GSVSVSLPSSG--PAAYTG-DEWDDMDDFDLGFEKKFS-RPAVLSP-----KGPRT--
Lizard     125 QLENPKADHNSSYSIINIDVWDDIDDFEIAARQEKKCSKSPASLSS---NTLLAKKSKAPKNQPLTSE
Xenopus    122 DAASKKTGINTSFGSVTSL-EEDWDLDDFDTSVSPKSH-AGKGG-----KTPOK-C
Zebrafish  138 NDQTVELKHI---SQLSF-NEWDDLDDEFETPVKSRVAS-PVAGTST-----KKPVSVD

Human      NTV-----KTDLPPSSESEQIDLTEE-----QKDDS-EWLSSDVVICIDGPIAE
Mouse      NAV-----KTDLTPPSPECLQVDLTKESSEEEEE---EEEAEGA-DCLSRDVIICIDNDSASE
Chicken    -----PQGRGLRVSKARADVGPQEHGSE-VSCSQGSSQGLICLDGAGAPA
Lizard     QLVPLVSRQGSQQL---CNEGTVNKSNTIQIPDDDDQ-----EEN-APGQSVICLGPITS-H
Xenopus    K---NTSPVASFKIQSISPEGPTTEKHDCAKLLYDNNEVASEPRKNLHAKTA-ESPQSLVCLASVEP-T
Zebrafish  Q---NTSSSCSSK---CEETKVNESQA-----TET-ITAPKDVLSAANGVS-T

Human      VHINEDAQESDSL-KTH-----LEDERD---NSEKKNLLEEALHST
Mouse      ELTEKDTQESQSL-KAH-----LGAERG---DSEKKSHEDEAVFHSV
Chicken    AAVLSDNGMEEARAATN-----GGSGESQKLSNGEKSSQLEPGDV-GN
Lizard     DGSYEDVPANRPL-GSP-----PGSKKVESLEI-RNDKGEKPGSA-CN
Xenopus    NLERDMCRNTDYL-G-----TDDLE-HDQETL-----
Zebrafish  ETAEREPEDS-PIKSKRPPKSVQHTALLSDTEDEEIIHCVSPDTNQKNFKSVAVAEKDKWGPENVI-D-

Human      EKVPCIE-FDDDDYDTDFVPPSPEEIIISA-SSSSKCLSTLKD-----LDTSDRK--EDVLST-SKD
Mouse      QNTEYFE-HNDNDYDIDFVPPSPEEIIIST-ASSSLKCSMLKD-----LDDSDKE--KGLIST-SEE
Chicken    ELLADIE-LEED-DYLDVPPSPEEELPS-FSPSVNVSNIFK-----ESPTDGR--SAVHGTESEP
Lizard     DPEVCNE-SETE-DYVDFIIPSPSEEEAPSSASSFSISYIFK-----ESAVEKTRSPQALK--SSS
Xenopus    -SQVLI-EEDD-CEPDIIPSPSDESLS-SPPVLKVISQQRKHVSSSLTDVNDCENT--TDH-----
Zebrafish  -SDDCENNHYE-GFEDEIIPSPTEETS-LSVSDSEKSSSEP-----VTPANKK--ESS-----

Human      LLSKPEKMSMQEL---NPETSTDCDARQIS-LQQQLIHVMEHICKLIDTTPDDKLLDCCGNEILLQQRN
Mouse      LLSKPEEMTTHKS---DAGTSKCDQAQIR-IQQQLIHVMEHICKLVDTVPTDELEALNCGTEILLQQRN
Chicken    ELMAPKQPAEQD---SSAEHADKGLH-LEQQLYSVMEDICKLVDAIPLHELTSISCAKELLQQRQ
Lizard     GASSGRKAQEDSDEGGFSEVQCYLSGKFFP-SGQSLYSVMEDICKLVDSIPEPDLRFLSCGSELIRHRD
Xenopus    LQ--GQS-----VSTSLDS---K-VPSQLLTLMLICLDLVKTIPISELHVLSCGLQKKRDR
Zebrafish  RSASGLP-----APLDQSAKGLKGADDAIFSVMESICCLVDIPEHELIALTCGTEILLQRA

Human      IRRKLLTEVDF-NKSDASLLG-----SLWRYRFPDSIDGPMEGDSCPTG-----NSMK
Mouse      IRRKLLAEAGF-NGNDVRLLG-----SLWRHRPDSIDNTVQGDSCPVG-----HPNK
Chicken    LRRKLLADSGA-LNTN-----SNGPRNWKACVQDPPSRPGTPLCSGFGRGVS
Lizard     YRYDGLSDSGVFRLEE-----ENWDSPPGGMSTSTQ-----PSVR
Xenopus    MRKRLSNDVSV-FRSPADSSVSLTSTCTSSQNRDFNWNAPKGAESLSGS-----SVSK
Zebrafish  HRKRILAKGGS-SRTSH-----SDSISTPG-----FLN

Human      ELNFSHLP-----SNSVSPGDCLLTTT---LGRKGFSAIR-----KNLF-----
Mouse      ELNSPYLL-----SHSPSTEECLPTTT---PGRKGFSAIR-----KNLF-----
Chicken    SVG-----STPK---STNLPSVLSRT---VNSSSFSITIR-----NQTLDKLDTSYSS
Lizard     KFG-----VFERHHNFHSTPSVVPFV---QGTSNVSLSRFPF-----NSAL-----
Xenopus    VFKFNKLAVDIGTKESSENSANSAPNFMEKI---GNRTSFSFRA-GG-----DSIM-----
Zebrafish  RPTFGVTP-----SNLT---SLTPVTSKGREGVKIGFSFRK-SIASVMSVGDSESVF-----

Human      ---ER-----PLFNTHLQKSFVSSNWAE--TP-----
Mouse      ---ER-----PLLNSHLQKSFVSSNWAE--TP-----
Chicken    KETDQEVICL-EPAALPSPKVNGKGSTLSRPPSEASF-----NGSWCE--KP-----
Lizard     ---EN-----GI-----SPL-----
Xenopus    ---EN-----SFNF-----HSSVL-----
Zebrafish  ---EDSDCIINGVETPGGTWPNPNSSTKISAG-RDTF-----NGSIQTLKPKESKTDKCYRSLFSN

Human      -RLGKKNESYFPGN--VLTSTAV----KDQNK-HTASIND----LERE---TQPSYDIDNEDIDDFD
Mouse      -RMENRNESTDFPGS--VLTSTTV----KAQSK-QAASGWN----VERH---GQASYDIDNENIDDFD
Chicken    -T-GRDSGNWRVPER--PTASTAL----KAQ---HTAPAGNPASGCWD-V---NDTDFLDHEDIDDFD
Lizard     ----QNASLSFKPKR--GSSGERMSENFMNPEMNVTAESDS----LA-N---RAGNEDDNEFDIDDLN
Xenopus    ----SNSRFNTPQNEKPISSSTC---TRP---YSQPIDD---MD-N---PDLDFDIDNEDIDDLN
Zebrafish  ES-SNQTDLFYSPKR--VDSGSRNAD---SSVEI-NIAGSSS----LR-TGAEPVDDFDLDDDEFIDDFD

Human      DDD---DWEDIMHNLA-SSKSTAYQPI 587
Mouse      DDDDDDDWENIMHNFPA-SSKSTATYPI 595
Chicken    EGW----EEAVAPEAAPEAPPAPQWQPL 561
Lizard     ELD-----EIIQLSGA-EQPLQASCLPA 569
Xenopus    DIH---CLDSPAAPSV--SSKNVPQYPTI 552
Zebrafish  ENDIPDYEEPPSVLES-RNNSGVKTPSV 616

```

**Figure S2 (related to Figure 2): Sequence alignment of BLM 133-587.** Alignments were carried out using T-Coffee (<http://tcoffee.org.cat/apps/tcoffee/do:regular>) and Boxshade ([http://www.ch.embnet.org/software/BOX\\_form.html](http://www.ch.embnet.org/software/BOX_form.html)) programs. Conserved residues are highlighted in black, similar residues are highlighted in grey. Human S304 and equivalent residues in other organisms are shown in bold and indicated with a red triangle.

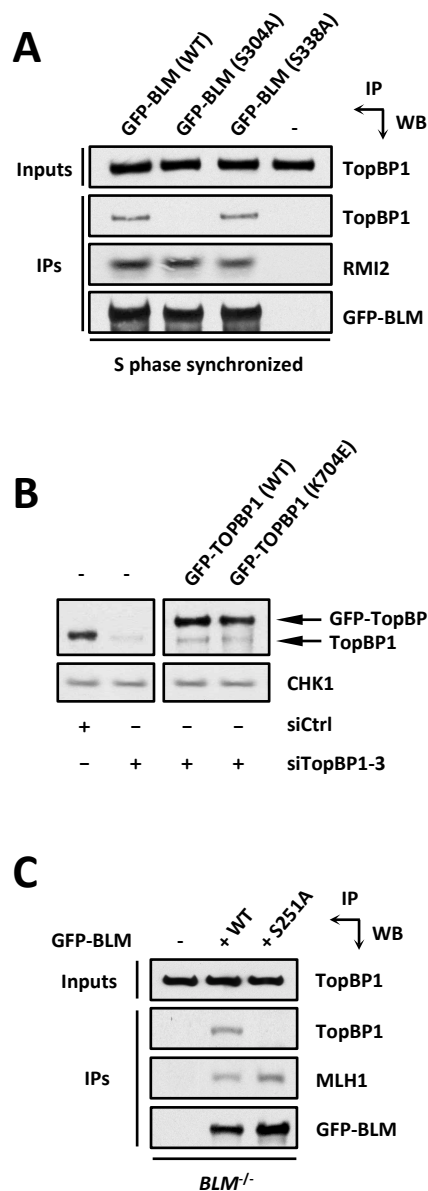

**Figure S3 (related to Figure 3): Ser338 of BLM is not required for TopBP1 binding in S phase and generation of cells stably expressing point mutations of BLM and TopBP1.** (A) Mutation of BLM Ser338 to alanine does not affect its interaction with endogenous TopBP1 in S phase. Pulldowns were carried out from 293FT cells transiently transfected with the indicated plasmids and released from a thymidine block. (B) Complementation of TopBP1-depleted cells with WT and K704E TopBP1. U2OS cells stably expressing GFP-tagged WT or K704E TopBP1 and their parental line were transfected with siRNA targeting firefly luciferase (siCtrl) or the TopBP1 UTR (siTopBP1-3). CHK1 is a loading control. (C) Ser251 is the chicken equivalent of Ser304 in human BLM. *BLM*<sup>-/-</sup> DT40 cells were stably complemented with the indicated plasmids. MLH1 was used as a positive control for BLM binding as it binds the C-terminus of BLM.

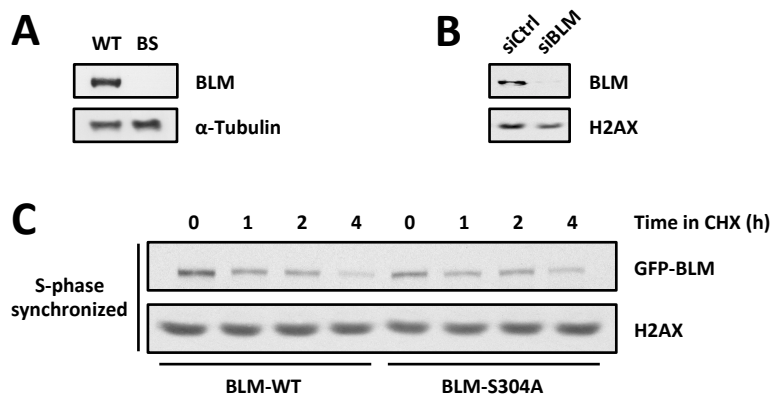

**Figure S4 (related to Figure 4): Specificity of the BLM antibody used in this study and S phase stability of mutant BLM that cannot bind TopBP1. (A)** Western blot of cell extracts from a Bloom syndrome (BS) patient and a healthy donor (WT). Tubulin is a loading control. **(B)** Western blot of extracts from U2OS cells treated with siRNA targeting firefly luciferase (siCtrl) or BLM (siBLM). H2AX is a loading control. **(C)** BLM-TopBP1 interaction does not maintain BLM stability in S phase. U2OS cells stably expressing GFP-BLM proteins were released from a thymidine block, and cycloheximide (CHX) was added for the indicated times before harvesting for western blotting. H2AX is a loading control.

## Supplemental Experimental Procedures

### Primary antibodies used in this study.

| Target            | Antibody No.   | Source                    | Application* | Dilution  |
|-------------------|----------------|---------------------------|--------------|-----------|
| BLM               | A300-110A      | Bethyl Laboratories       | IP, WB       | 1:5000    |
| BLM-pS304         | -              | Dr. Yi Wang               | WB           | 1:500     |
| CHK1              | sc8408         | Santa Cruz Biotechnology  | WB           | 1:1000    |
| CldU              | ab6326         | Abcam                     | IF           | 1:400     |
| E1A               | -              | Dr. Roger Grand           | WB           | 1:15      |
| FANCI             | 4578           | Cell Signaling Technology | WB           | 1:1000    |
| FLAG              | F1804          | Sigma-Aldrich             | WB           | 1:1000    |
| GFP               | 11 814 460 001 | Roche                     | WB           | 1:2000    |
| GST               | sc138          | Santa Cruz Biotechnology  | WB           | 1:2000    |
| H2AX              | ab11175        | Abcam                     | WB           | 1:5000    |
| IdU               | 347580         | BD Biosciences            | IF           | 1:25      |
| Ku70              | ab3114         | Abcam                     | WB           | 1:400     |
| Ku80              | MS-285-P1      | Thermo Scientific         | WB           | 1:2000    |
| MDC1              | -              | Dr. Grant Stewart         | WB           | 1:1000    |
| MLH1              | ab92312        | Abcam                     | WB           | 1:10,000  |
| NBS1              | ab7860         | Abcam                     | WB           | 1:5000    |
| p53               | sc126          | Santa Cruz Biotechnology  | WB           | 1:1500    |
| RMI1              | ab70525        | Abcam                     | WB           | 1:1000    |
| RMI2              | NBP1-89962     | Novus Biologicals         | WB           | 1:5000    |
| TOP3A             | 14525-1-AP     | Proteintech               | WB           | 1:1000    |
| TopBP1            | A300-111A      | Bethyl Laboratories       | IP, WB       | 1:5000    |
| $\alpha$ -Tubulin | T5168          | Sigma-Aldrich             | WB           | 1:100,000 |

\*IF, immunofluorescence; IP, immunoprecipitation; WB, Western blotting.

**Plasmids used in this study.**

| <b>Plasmid expressing</b>  | <b>Vector</b>       | <b>Organism</b> | <b>Details</b>                                                           |
|----------------------------|---------------------|-----------------|--------------------------------------------------------------------------|
| GFP-BLM                    | pEGFP-C1            | Human           | (Hu et al., 2001)                                                        |
| GFP-BLM (133-1417)         | pEGFP-C1            | Human           | (Hu et al., 2001)                                                        |
| GFP-BLM (1-1222)           | pEGFP-C1            | Human           | T1223X mutation introduced by site-directed mutagenesis into GFP-BLM     |
| GFP-BLM (1-587)            | pEGFP-C1            | Human           | K588X mutation introduced by site-directed mutagenesis into GFP-BLM      |
| GFP-BLM (1-133)            | pEGFP-C1            | Human           | T134X mutation introduced by site-directed mutagenesis into GFP-BLM      |
| GFP-BLM (S304A)            | pEGFP-C1            | Human           | S304A mutation introduced by site-directed mutagenesis into GFP-BLM      |
| GFP-BLM (S338A)            | pEGFP-C1            | Human           | S338A mutation introduced by site-directed mutagenesis into GFP-BLM      |
| GFP-BLM                    | pEGFP-C1            | Chicken         | (Hirano et al., 2005)                                                    |
| GFP-BLM (S251A)            | pEGFP-C1            | Chicken         | S251A mutation introduced by site-directed mutagenesis into GFP-BLM      |
| GFP-TopBP1                 | pIRESneo2           | Human           | (Cescutti et al., 2010)                                                  |
| GFP-TopBP1 (BRCT1-K154/5A) | pIRESneo2           | Human           | K154/5A mutation introduced by site-directed mutagenesis into GFP-TopBP1 |
| GFP-TopBP1 (BRCT5-K704A)   | pIRESneo2           | Human           | K704A mutation introduced by site-directed mutagenesis into GFP-TopBP1   |
| GFP-TopBP1 (BRCT5-K704E)   | pIRESneo2           | Human           | K704E mutation introduced by site-directed mutagenesis into GFP-TopBP1   |
| GFP-TopBP1 (BRCT5-W711R)   | pIRESneo2           | Human           | W711R mutation introduced by site-directed mutagenesis into GFP-TopBP1   |
| GFP-TopBP1 (BRCT7-K1317A)  | pIRESneo2           | Human           | K1317A mutation introduced by site-directed mutagenesis into GFP-TopBP1  |
| GST-TopBP1 (BRCT4+5)       | pGEX-4T-1           | Human           | (Schmidt et al., 2008)                                                   |
| GST-TopBP1 (BRCT5)         | Contact Wang et al. | Human           | (Wang et al., 2013)                                                      |
| SFB-BLM                    | Contact Wang et al. | Human           | (Wang et al., 2013)                                                      |
| SFB-BLM (K3A)              | Contact Wang et al. | Human           | (Wang et al., 2013)                                                      |
| SFB-BLM (S304A)            | Contact Wang et al. | Human           | S304A mutation introduced by site-directed mutagenesis into SFB-BLM      |
| SFB-BLM (S338A)            | Contact Wang et al. | Human           | (Wang et al., 2013)                                                      |

**siRNAs used in this study.**

| <b>Name</b> | <b>Target</b>      | <b>Sequence</b>           |
|-------------|--------------------|---------------------------|
| siCtrl      | Firefly luciferase | 5'-CGUACGCGGAAUACUUCGA-3' |
| siTopBP1-1  | TopBP1             | 5'-ACAAAUACAUGGCUGGUUA-3' |
| siTopBP1-2  | TopBP1             | 5'-CUCACCUUAUUGCAGGAGA-3' |
| siTopBP1-3  | TopBP1             | 5'-GUAAAUAUCUGAAGCUGUA-3' |
| siTopBP1-4  | TopBP1             | 5'-GCACAAGGUUAAUGAGGA-3'  |
| siBLM       | BLM                | 5'-GCUAGGAGUCUGCGUGCGA-3' |

**Peptides used in this study.**

| <b>Peptide</b> | <b>Sequence</b>                             |
|----------------|---------------------------------------------|
| S304           | Biotin-DTDFVPPSPEEII-NH <sub>2</sub>        |
| pS304          | Biotin-DTDFVPP[pS]PEEII-NH <sub>2</sub>     |
| S338           | Biotin-CKEDVLSTSKDLLSKPE-NH <sub>2</sub>    |
| pS338          | Biotin-CKEDVLST[pS]KDLLSKPE-NH <sub>2</sub> |

Peptides were found to be >95% pure after reverse phase high-performance liquid chromatography and compositions were verified by mass spectrometry.



## Supplemental References

Hirano, S., Yamamoto, K., Ishiai, M., Yamazoe, M., Seki, M., Matsushita, N., Ohzeki, M., Yamashita, Y.M., Arakawa, H., Buerstedde, J.M., *et al.* (2005). Functional relationships of FANCC to homologous recombination, translesion synthesis, and BLM. *The EMBO journal* 24, 418-427.

Schmidt, U., Wollmann, Y., Franke, C., Grosse, F., Saluz, H.P., and Hanel, F. (2008). Characterization of the interaction between the human DNA topoisomerase IIbeta-binding protein 1 (TopBP1) and the cell division cycle 45 (Cdc45) protein. *The Biochemical journal* 409, 169-177.
